# Supplementary material for: Persistent impacts of the 2018 drought on forest disturbance regimes in Europe
Source: Copernicus journal article supplement (doi:10.5194/bg-18-5223-2021), 2021-09-27
Supplement: Supplementary file 2 [file bg-18-5223-2021-supplement.zip]

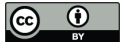

*Supplement of*

**Persistent impacts of the 2018 drought on forest disturbance regimes in Europe**

**Cornelius Senf and Rupert Seidl**

*Correspondence to:* Cornelius Senf (cornelius.senf@tum.de)

- bg-18-5223-2021-supplement-title-page.pdf
- Figure\_S1.pdf
- Table\_S1.csv
- Table\_S2.csv
- \_\_MACOSX
  - .\_Figure\_S1.pdf
  - .\_Table\_S1.csv
  - .\_Table\_S2.csv

The copyright of individual parts of the supplement might differ from the article licence.
