# Supplementary figures and images for: Persistent impacts of the 2018 drought on forest disturbance regimes in Europe
Source: Copernicus journal article supplement (doi:10.5194/bg-18-5223-2021), 2021-09-27

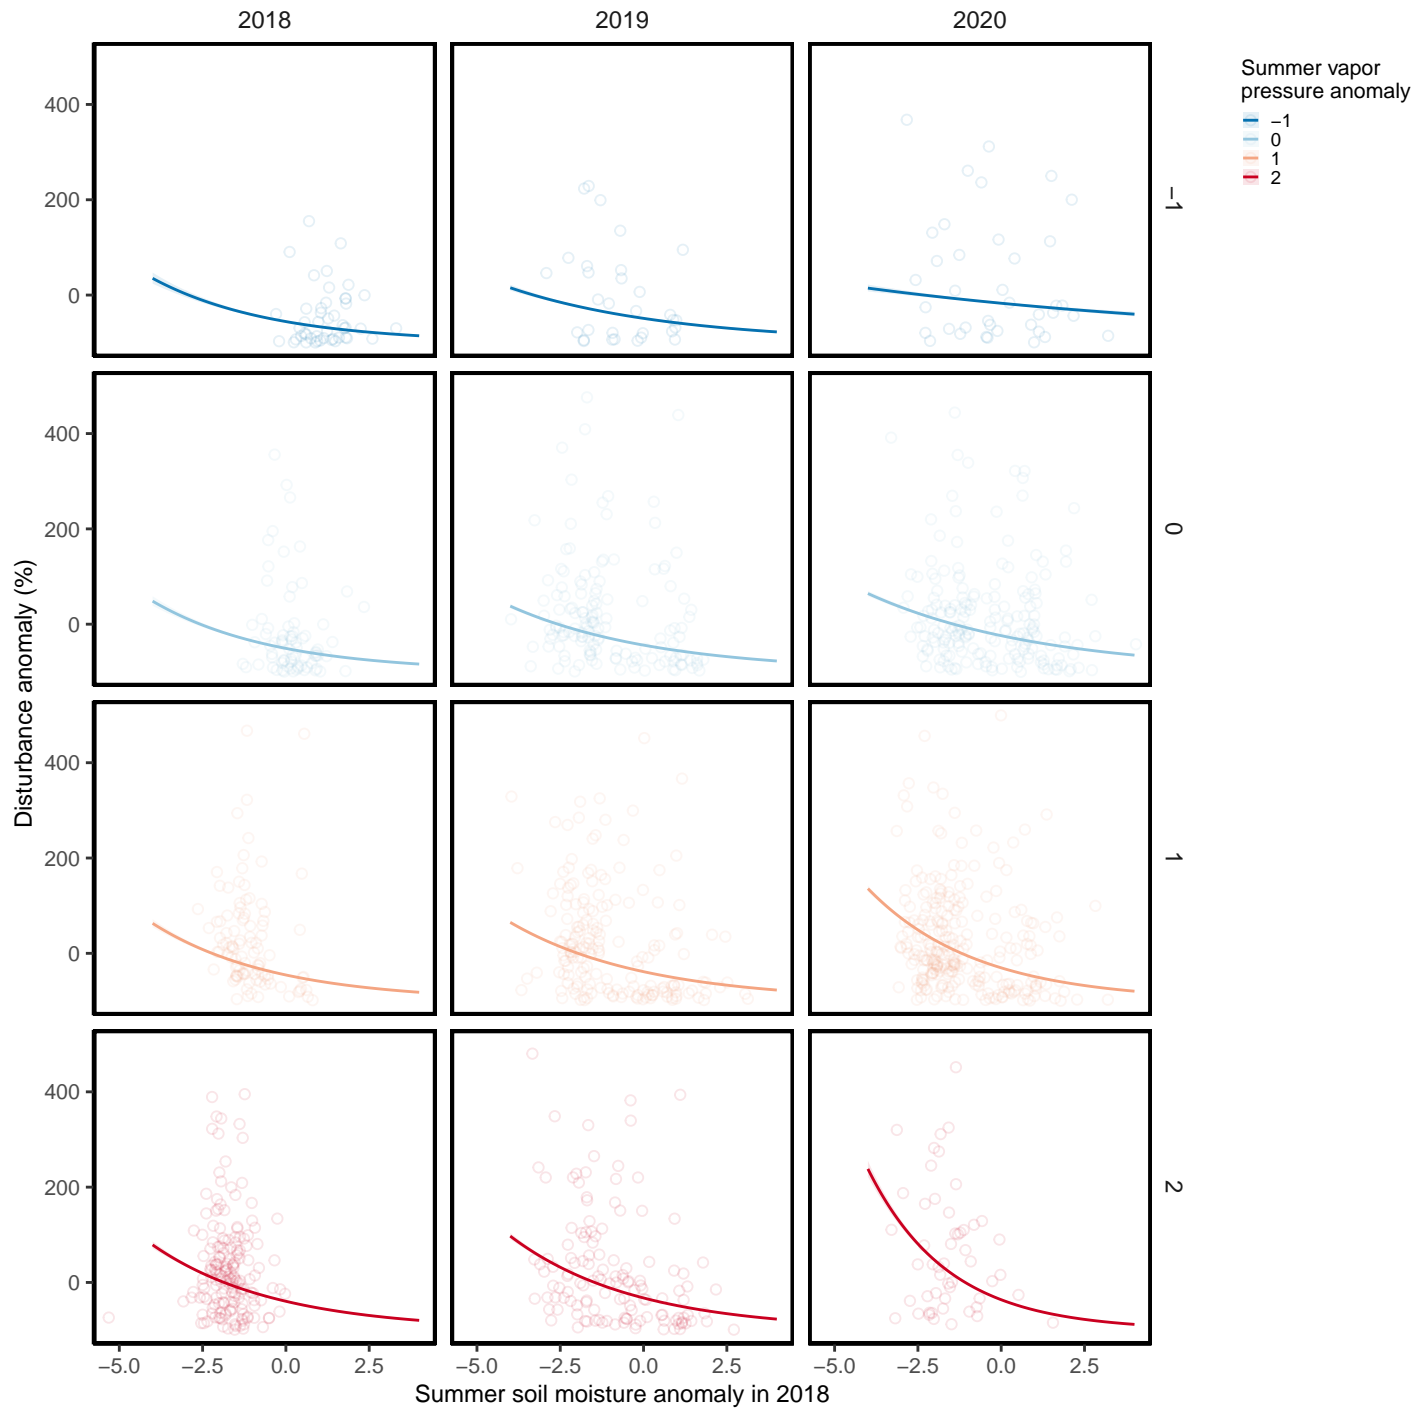

Supplement: Supplementary file 1 [file bg-18-5223-2021-supplement.zip]
